# Supplementary material for: Influence of Major Trauma and Lower Limb Loss on Radiographic Progression and Incidence of Knee Osteoarthritis and Pain: A Comparative and Predictive Analysis from the ADVANCE Study
Source: Research Square preprint supplement (doi:10.21203/rs.3.rs-6119632/v1), 2025-04-21
Supplement: Supplementary file 2 [file 9782086cda8a0ab20a1c8a92.docx]

Table X. Baseline serum candidate osteoarthritis biomarker concentrations

|  | Total | Unexposed | Exposed | Exp-NA | Exp-A | Exp-K |
| --- | --- | --- | --- | --- | --- | --- |
|  | N=1,118 | N=553 | N=565 | N=389 | N=141 | N=35 |
| IL-1β | 0.02 (0.02-0.06) | 0.02 (0.02-0.06) | 0.02 (0.02-0.06) | 0.02 (0.02-0.06) | 0.02 (0.02-0.06) | 0.02 (0.02-0.06) |
| TNFα | 1.94 (0.58) | 1.94 (0.64) | 1.93 (0.52) | 1.94 (0.56) | 1.92 (0.41) | 1.93 (0.42) |
| IL-17α | 1.30 (0.97-1.82) | 1.27 (0.96-1.82) | 1.33 (0.98-1.82) | 1.32 (0.99-1.77) | 1.33 (0.96-1.91) | 1.23 (0.99-1.73) |
| CTX-II | 0.20 (0.05-0.64) | 0.22 (0.05-0.67) | 0.18 (0.05-0.62) | 0.20 (0.05-0.62) | 0.15 (0.05-0.70) | 0.05 (0.05-0.37) |
| Leptin | 5.65 (3.04-9.29) | 5.51 (2.97-8.75) | 5.80 (3.23-9.93) | 5.68 (3.16-9.37) | 6.09 (3.16-11.67) | 8.68 (4.57-12.86) |
| COMP | 263.56 (88.53) | 267.07 (88.71) | 260.11 (88.30) | 280.31 (86.15) | 208.57 (76.20) | 243.25 (69.00) |
| Adipo | 6.33 (4.49) | 6.21 (4.01) | 6.46 (4.91) | 6.62 (5.25) | 6.29 (4.36) | 5.32 (2.33) |
| PIIANP | 109.10 (73.90-160.10) | 109.20 (74.60-158.30) | 109.10 (72.90-160.70) | 111.40 (74.90-168.50) | 107.10 (71.50-155.50) | 92.60 (68.10-123.40) |

IL – Interleukin, TNF – Tumour Necrosis Factor, CTX-II – C-terminal cross-linked telopeptide of type II collagen, COMP – cartilage oligomeric protein, PIIANP – N-propeptide of collagen IIA, Adipo – Adiponectin. Exp-NA: Exposed - No lower limb amputation, Exp-A: Exposed – Lower Limb Amputation, Exp-K: Exposed – Knee Injured.

At baseline, 1118 of 1145 had serum collected, 553/565 unexposed and 565/579 exposed. The 27 participants without samples were due to participant refusal, unable to obtain sample or laboratory error.
